# Supplementary material for: Plasma-derived exosomal miR-4732-5p is a promising noninvasive diagnostic biomarker for epithelial ovarian cancer
Source: PubMed Central journal article supplement (PMC8082916; doi:10.1186/s13048-021-00814-z), 2021-04-28
Supplement: 13048_2021_814_MOESM4_ESM.pdf [file 13048_2021_814_MOESM4_ESM.pdf]

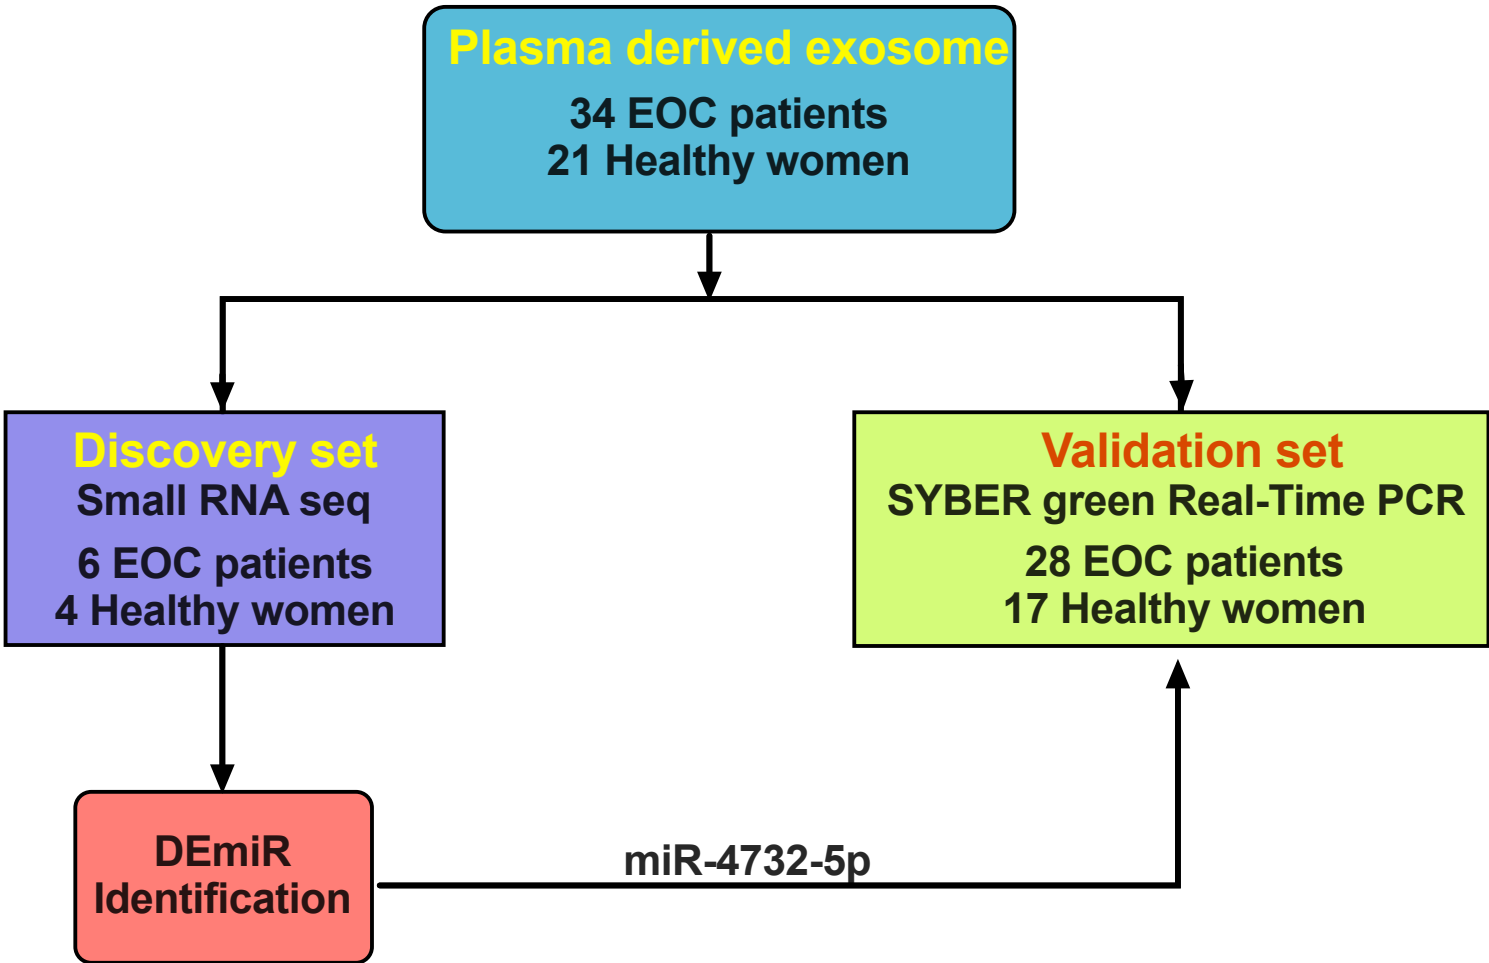

**Fig. S1** Study workflow. The schematic pipeline for plasma derived exosomal EOC miRNA biomarker identification. EOC: Epithelial Ovarian Cancer; DEmiRs: Differentially expressed miRNAs.
