# Supplementary material for: Plasma-derived exosomal miR-4732-5p is a promising noninvasive diagnostic biomarker for epithelial ovarian cancer
Source: PubMed Central journal article supplement (PMC8082916; doi:10.1186/s13048-021-00814-z), 2021-04-28
Supplement: 13048_2021_814_MOESM6_ESM.pdf [file 13048_2021_814_MOESM6_ESM.pdf]

**a**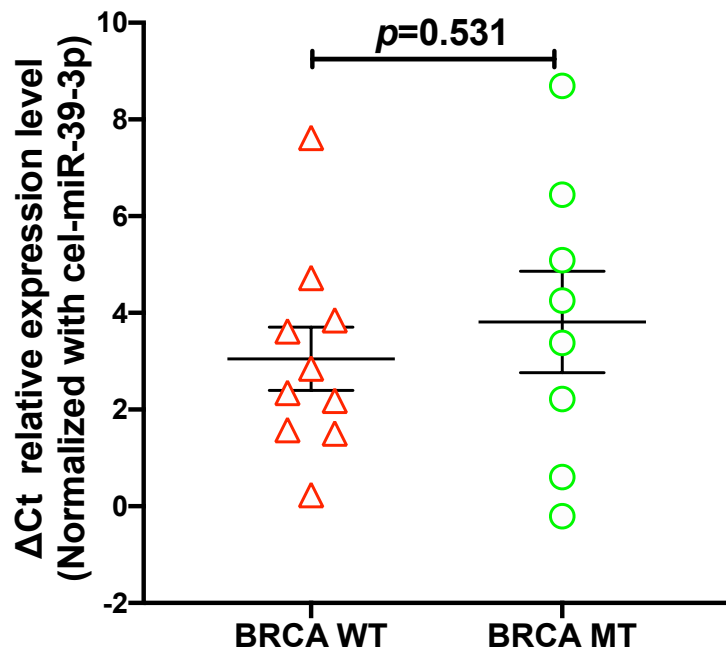**b**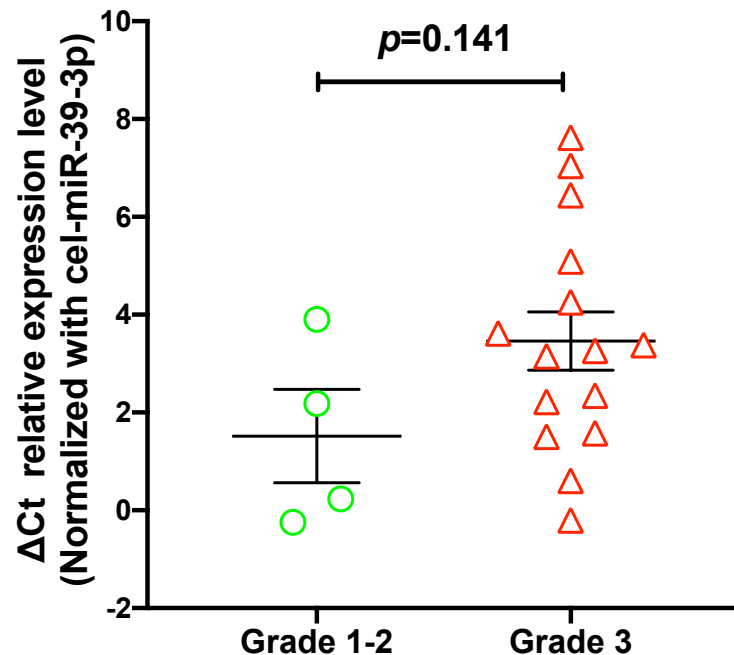

SYBER green quantitative RT-PCR indicated that there is no correlation between exosomal miR-4732-5p expression level and BRCA mutation status (a) , pathological grading (b).
